# Supplementary material
Source: Springer Nature journal article supplement (https://www.springermedizin.de/resource/supplementary/12913_2013_3035_MOESM5_ESM.pdf/9533284)

**Topic:** GP judging time not right to tell them about yet another condition

**Quote:** "No I don't want too much knowledge, you know, really, so the GP has to judge it if he knows his patient then he has to judge whether to tell them or not."

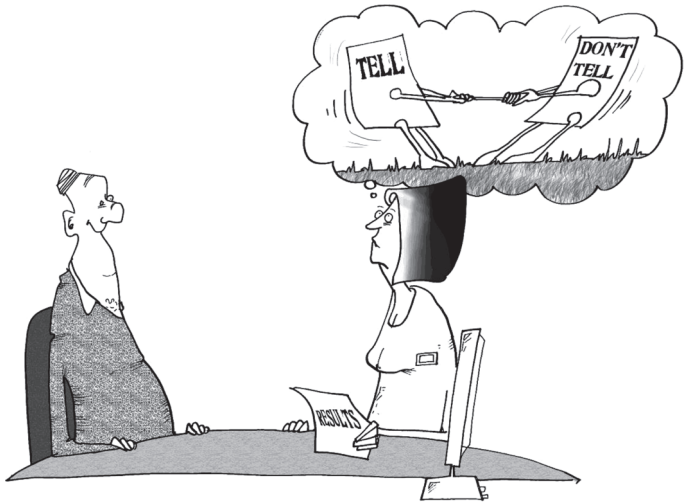

Supplement: MOESM5 [file 9533284]
